# Supplementary material
Source: publisher figshare collection journal article supplement (https://tandf.figshare.com/ndownloader/files/22522133)
Supplement: Supplementary file 1 [file 22522133]

## Supplementary material

| Regulatory period | Quantity effect | Output effect | Capital effect | Labour effect | Other input effect |
|-------------------|-----------------|---------------|----------------|---------------|--------------------|
| 1996-2000         | -8.63           | 7.20          | 3.82           | -4.83         | 16.84              |
| 2001-2005         | 6.42            | 8.42          | 4.02           | -1.76         | -0.26              |
| 2006-2010         | 13.64           | 5.65          | 8.24           | 2.87          | -19.08             |
| 2011-2016         | -76.49          | 5.77          | 86.39          | 2.39          | -6.52              |

Table S1. Average quantity effect and its decomposition expressed in millions of £ for English and Welsh water and sewerage companies according to regulatory cycles.

| Regulatory period | Quantity effect | Profit change | minus<br>Output price effect | Capital price effect | Labour price effect | Other input price effect |
|-------------------|-----------------|---------------|------------------------------|----------------------|---------------------|--------------------------|
| 1996-2000         | -8.63           | -24.86        | 7.66                         | 31.00                | 3.40                | -10.52                   |
| 2001-2005         | 6.42            | -12.92        | 7.92                         | 17.03                | 5.11                | 5.11                     |
| 2006-2010         | 13.64           | -35.84        | 25.88                        | 53.15                | 2.67                | 19.53                    |
| 2011-2016         | -76.49          | 26.54         | -1.67                        | -109.12              | -0.37               | 4.79                     |

Table S2. Alternative average quantity effect and its decomposition expressed in millions of £ for English and Welsh water and sewerage companies according to regulatory cycles.

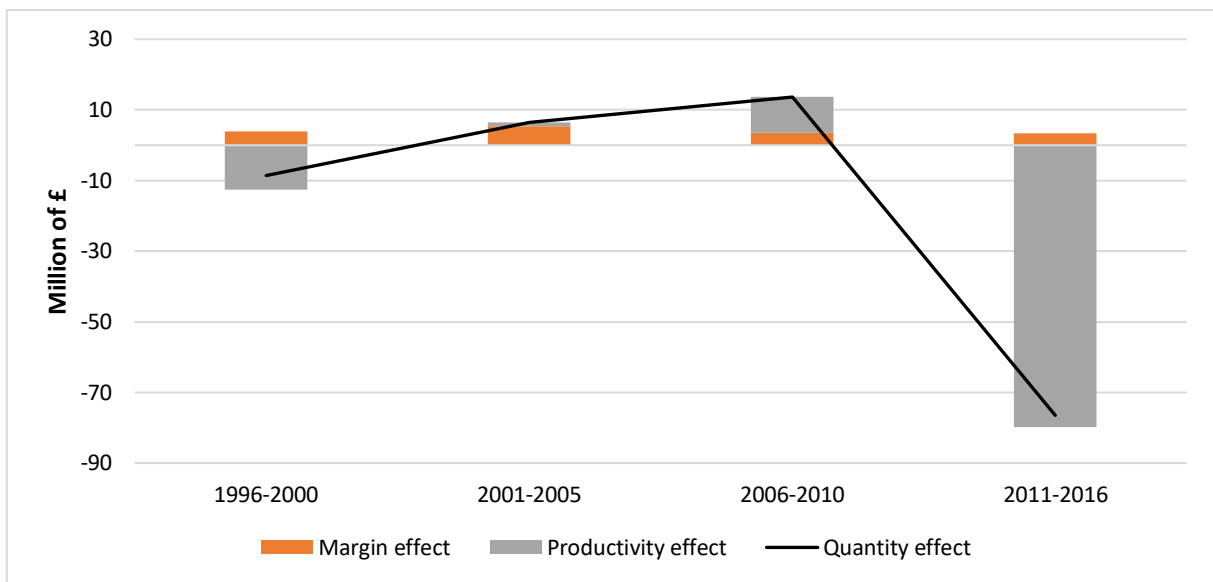

Figure S1. Average quantity effect change and its decomposition for English and Welsh water and sewerage companies according to regulatory cycles.

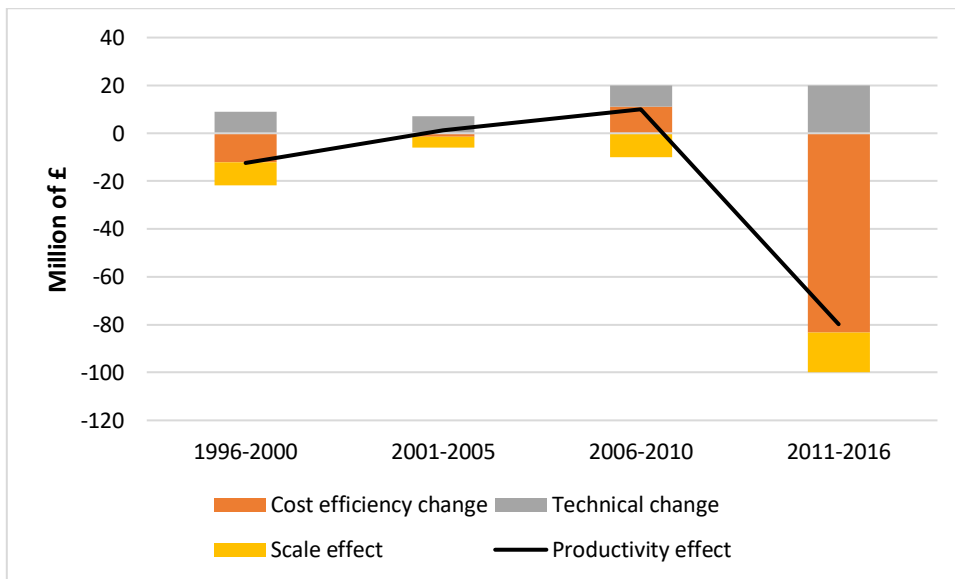

Figure S2. Average productivity effect change and its decomposition for English and Welsh water and sewerage companies according to regulatory cycles.
